# Supplementary material for: Dependence of magnetic coupling on ligands at the axial positions of NiII in phenoxido bridged dimers: experimental observations and DFT studies
Source: Royal Society of Chemistry journal article supplement (doi:10.1039/c6dt03855g), 2016-11-22
Supplement: c6dt03855g1.pdf [file c6dt03855g1.pdf]

## Dependence of Magnetic Coupling on Ligands at Axial Positions of Ni<sup>II</sup> in Phenoxido Bridged Dimers: Experimental Observations and DFT Studies

Monotosh Mondal<sup>a,b</sup>, Sanjib Giri<sup>a</sup>, Pampa M. Guha<sup>a,c</sup>, Ashutosh Ghosh<sup>a\*</sup>

<sup>a</sup> Department of Chemistry, University College of Science, University of Calcutta, 92, A.P.C. Road, Kolkata-700 009, India.

<sup>b</sup> Department of Chemistry, Haldia Government college, Debhog, Purba Medinipur-721657, India

<sup>c</sup> Department of Chemistry, The Heritage College, 994,-Madurdaha, chowbaga Road, Anandapur, Kolkata - 700107

\* E-mail: ghosh\_59@yahoo.com; Fax: +91-33-2351-9755; Tel: +91-94-3334-4484

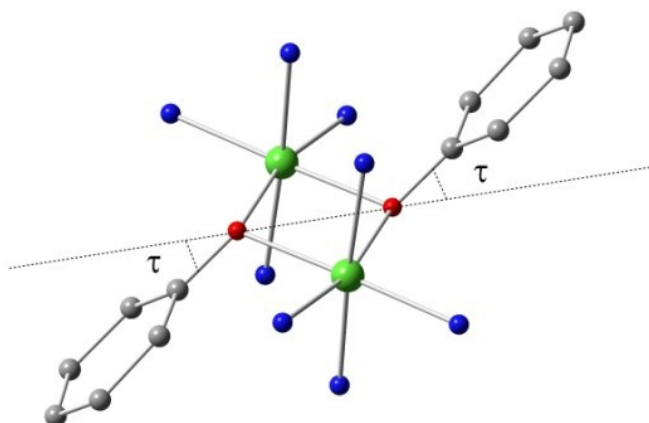

**Scheme S1:** Schematic representation for out-of-plane shift of phenyl rings is shown by  $\tau$  angle. Colour codes: Ni green, O red, N blue and C gray.

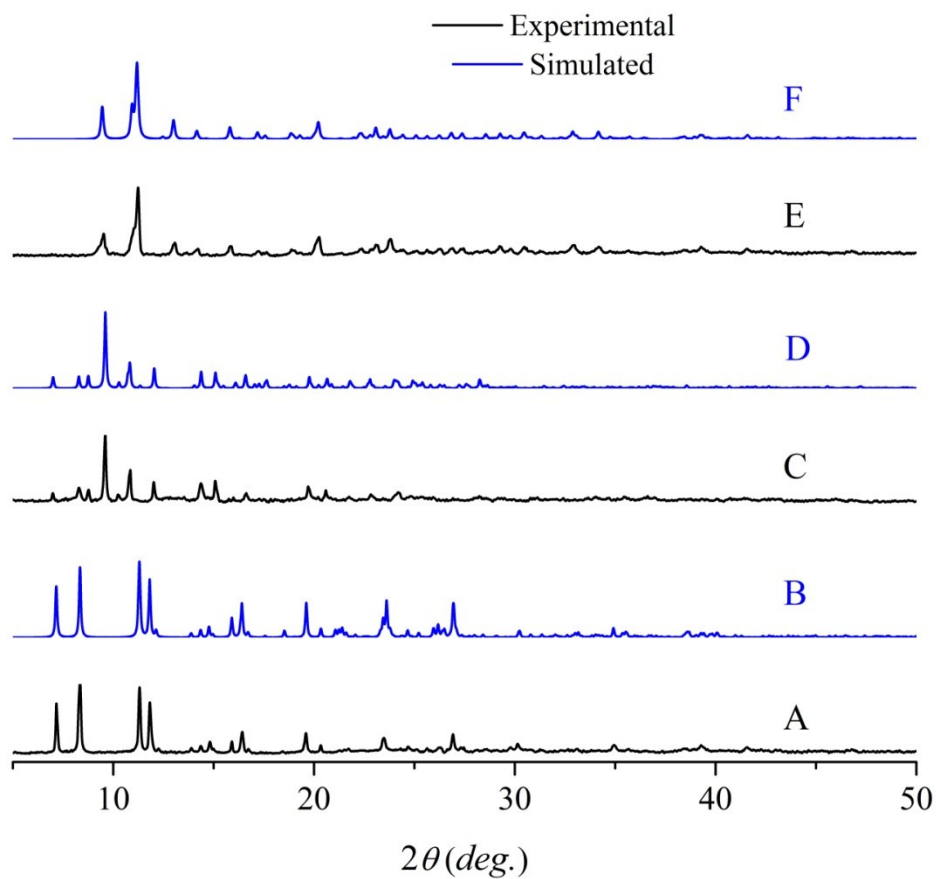

**Figure S1:** Intensity normalized PXRD patterns for complexes **1-3** are shown by A, C and E along with their respective simulated plots B, D and F.

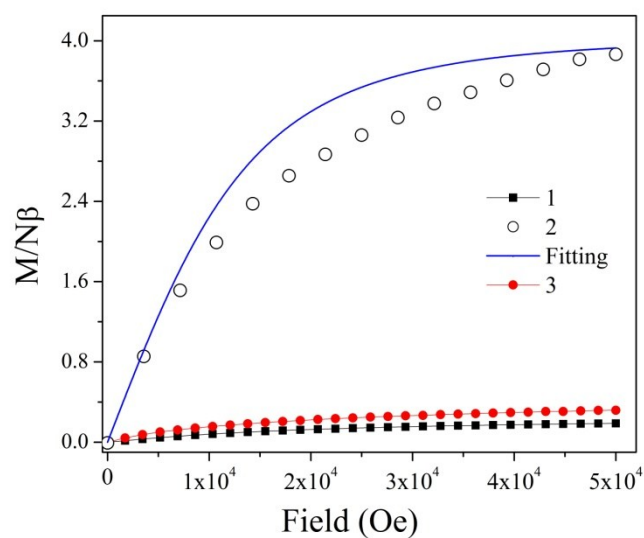

**Figure S2:** Field dependence of molar magnetizations for compounds **1-3** at 2 K. Solid blue line indicate the fitted curve for compound **2**, using Brillouin function,  $g = 2$  with  $S = 2$ .

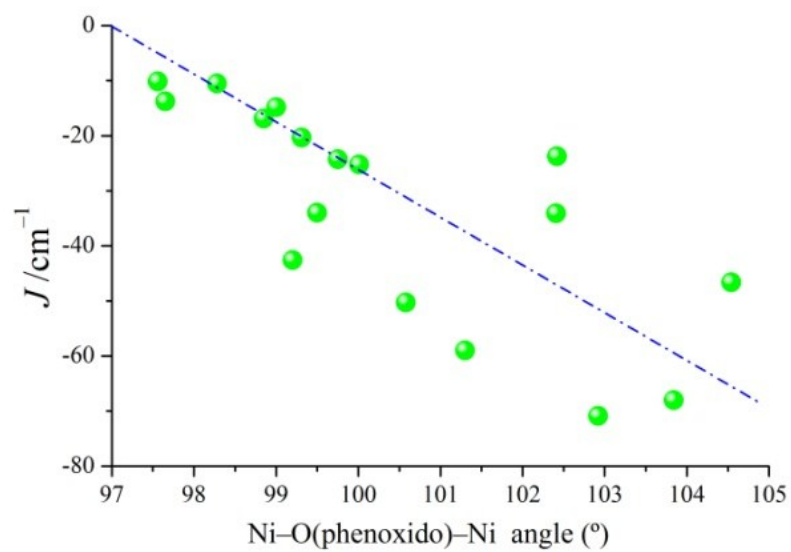

**Figure S3:** Plot of experimental  $J$  value vs.  $\angle\text{Ni-O-Ni}$  angle for earlier reported diphenoxido bridged dinuclear  $\text{Ni}^{\text{II}}$  complexes.

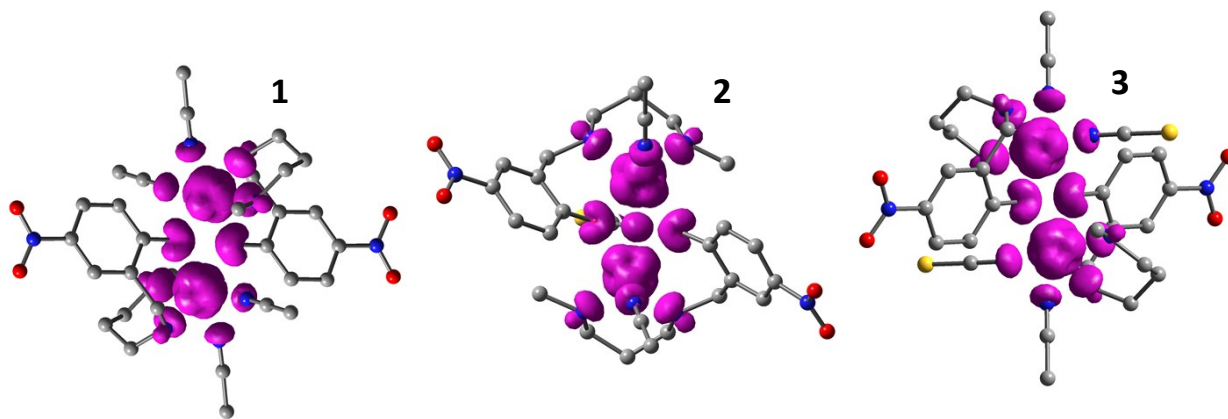

**Figure S4:** Spin density plots for triplet state of complexes 1–3 with surface cutoff value  $0.004 \text{ e}/\text{\AA}^3$ .

**Table S1:** Experimental  $J$  value vs.  $\angle\text{Ni-O-Ni}$  angle for earlier reported diphenoxido bridged dinuclear  $\text{Ni}^{\text{II}}$  complexes.

| Compounds                                                                                                                  | $J/\text{cm}^{-1}$ | Ni-O-Ni angle ( $^{\circ}$ ) | References |
|----------------------------------------------------------------------------------------------------------------------------|--------------------|------------------------------|------------|
| $[\text{Ni}_2\text{L}_2(\text{NO}_2)_2]\cdot\text{CH}_2\text{Cl}_2\cdot\text{C}_2\text{H}_5\text{OH}, 2\text{H}_2\text{O}$ | -10.52             | 98.28                        | <b>1</b>   |
| $[\text{Ni}_2\text{L}_2(\text{NO}_3)_2]$                                                                                   | -20.34             | 99.31                        | <b>2</b>   |
| $[\text{Ni}_2\text{L}_2(\text{NO}_2)_2]$                                                                                   | -25.25             | 100.01                       | <b>2</b>   |
| $[\text{Ni}_2(\text{L}_1)_2(\text{NCS})_2]$                                                                                | -46.64             | 104.54                       | <b>3</b>   |
| $[\text{Ni}_2(\text{L}_2)_2(\text{NCS})_2]$                                                                                | -70.9              | 102.92                       | <b>3</b>   |
| $[\text{Ni}_2(\text{L}_3)_2(\text{NCS})_2]$                                                                                | -68.04             | 103.84                       | <b>3</b>   |
| $[\text{Ni}_2\text{L}_2(\text{NO}_3)_2]$                                                                                   | -24.27             | 99.75                        | <b>4</b>   |
| $[\text{Ni}_2(\text{L})_2(\text{OAc})_2]$                                                                                  | -50.28             | 100.58                       | <b>5</b>   |
| $\{\text{Ni}(\text{Hsalhyph})\text{Cl}(\text{H}_2\text{O})\}_2$                                                            | -14.80             | 99                           | <b>6</b>   |
| $[\text{Ni}_2\text{L}(\text{H}_2\text{O})_4(\text{ClO}_4)_2\cdot 4\text{NH}_2\text{CONH}_2]$                               | -34                | 99.5                         | <b>7</b>   |
| $[\text{Ni}_2\text{L}(\text{NCS})_2(\text{H}_2\text{O})_2]\cdot 2\text{Me}_2\text{NCHO}$                                   | -42.6              | 99.2                         | <b>7</b>   |
| $[\text{Ni}_2\text{L}(\text{MeOH})_2(\text{ClO}_4)_2]\cdot 2\text{NH}_4\text{Et}$                                          | -59                | 101.3                        | <b>7</b>   |
| $[\text{NiL}_2(\text{o-HSal})]\cdot 2\text{H}_2\text{O}$                                                                   | -13.78             | 97.65                        | <b>8</b>   |
| $[\text{Ni}_2\text{L}_2(\text{o-Hap})_2]$                                                                                  | -16.87             | 98.85                        | <b>8</b>   |
| $[\text{Ni}_2\text{L}_2(\text{o-Hnap})_2]$                                                                                 | -10.14             | 97.56                        | <b>8</b>   |
| $[\text{Ni}_2\text{L}^{\text{R}_2}(\text{CH}_3\text{CN})_4](\text{ClO}_4)_2\cdot 2\text{CH}_3\text{CN}$                    | -34.10             | 102.41                       | This work  |
| $[\text{Ni}_2\text{L}^{\text{R}_2}(\text{NCS})_2(\text{CH}_3\text{CN})_2]$                                                 | -23.72             | 102.42                       | This work  |

**Table S2:** Mulliken's atomic spin populations computed for triplet state of compounds **1–3**.

| Selected atoms                             | Complex 1 | Complex 3 | Selected atoms                | Complex 2 |
|--------------------------------------------|-----------|-----------|-------------------------------|-----------|
| Ni(1)                                      | 1.66548   | 1.68023   | Ni(1)                         | 1.66779   |
| Ni(1) <sup>a</sup>                         | 1.66543   | 1.68021   | Ni(2)                         | 1.67502   |
| O(10) <sub>phenoxido1</sub>                | 0.09881   | 0.09201   | O(10) <sub>phenoxido1</sub>   | 0.08364   |
| O(10) <sup>a</sup> <sub>phenoxido2</sub>   | 0.09881   | 0.09202   | O(24) <sub>phenoxido2</sub>   | 0.08124   |
| N(1) <sub>coordinating</sub>               | 0.03721   | 0.05325   | N(2) <sub>coordinating</sub>  | 0.04705   |
| N(1) <sup>a</sup> <sub>coordinating</sub>  | 0.03720   | 0.05326   | N(3) <sub>coordinating</sub>  | 0.04041   |
| N(2) <sub>coordinating</sub>               | 0.04403   | 0.04085   | N(18) <sub>coordinating</sub> | 0.08335   |
| N(2) <sup>a</sup> <sub>coordinating</sub>  | 0.04403   | 0.04085   | N(22) <sub>coordinating</sub> | 0.07269   |
| N(22) <sub>coordinating</sub>              | 0.08961   | 0.07550   | N(32) <sub>coordinating</sub> | 0.08037   |
| N(22) <sup>a</sup> <sub>coordinating</sub> | 0.08961   | 0.07551   | N(36) <sub>coordinating</sub> | 0.07093   |
| N(18) <sub>coordinating</sub>              | 0.08084   | 0.07455   | N(1) <sub>isocyanate</sub>    | 0.02348   |
| N(18) <sup>a</sup> <sub>coordinating</sub> | 0.08084   | 0.07455   | C(1) <sub>isocyanate</sub>    | 0.01065   |
|                                            |           |           | S(1) <sub>isocyanate</sub>    | 0.04985   |

**Table S3:** A series of model complex (**3b-3d**) are created by changing only one Ni–N bond distance in complex **3a** to a value as it is in complex **1a**, keeping rest of the parameters unaltered. Changes are highlighted by bold font.

| Bond length (Å)                   | Complex <b>1a</b> | Complex <b>3a</b> | Model <b>3b</b> | Model <b>3c</b> | Model <b>3d</b> | Model <b>3e</b> |
|-----------------------------------|-------------------|-------------------|-----------------|-----------------|-----------------|-----------------|
| Ni(1)–N(1)                        | 2.171             | 2.068             | <b>2.171</b>    | 2.068           | 2.068           | 2.068           |
| Ni(1)–N(2)                        | 2.104             | 2.126             | 2.126           | <b>2.104</b>    | 2.126           | 2.126           |
| Ni(1)–N(18)                       | 2.081             | 2.101             | 2.101           | 2.101           | <b>2.081</b>    | 2.101           |
| Ni(1)–N(22)                       | 2.098             | 2.103             | 2.103           | 2.103           | 2.103           | <b>2.098</b>    |
| Ni(1)–O(10)                       | 2.077             | 2.097             | 2.097           | 2.097           | 2.097           | 2.097           |
| Ni(1)–O(10) <sup>a</sup>          | 2.085             | 2.094             | 2.094           | 2.094           | 2.094           | 2.094           |
| <i>J</i> value / cm <sup>-1</sup> | –36.50            | –24.8             | –25.809         | –25.28          | –25.374         | –24.704         |

**Table S4:** A series of model complex (**3f-3k**) are created by changing two random Ni–N bond distances in complex **3a** to as it is in complex **1a**, keeping rest of the parameters unaltered. Model complex (**3l**) is created by changing all the Ni–N bond distances in complex **3a** to as it is in complex **1a**, keeping rest of the parameters unaltered. Model complex (**3m**) is created by changing all the Ni–N bond distances and Ni–O bond distances in complex **3a** to as it is in complex **1a**, keeping rest of the parameters unaltered. Changes are highlighted by bold font.

| Bond length (Å)                   | Model <b>3f</b> | Model <b>3g</b> | Model <b>3h</b> | Model <b>3i</b> | Model <b>3j</b> | Model <b>3k</b> | Model <b>3l</b> | Model <b>3m</b> |
|-----------------------------------|-----------------|-----------------|-----------------|-----------------|-----------------|-----------------|-----------------|-----------------|
| Ni(1)–N(1)                        | <b>2.171</b>    | 2.068           | 2.068           | <b>2.171</b>    | <b>2.171</b>    | 2.068           | <b>2.171</b>    | <b>2.171</b>    |
| Ni(1)–N(2)                        | <b>2.104</b>    | <b>2.104</b>    | 2.126           | 2.126           | 2.126           | <b>2.104</b>    | <b>2.104</b>    | <b>2.104</b>    |
| Ni(1)–N(18)                       | 2.101           | <b>2.081</b>    | <b>2.081</b>    | 2.101           | <b>2.081</b>    | 2.101           | <b>2.081</b>    | <b>2.081</b>    |
| Ni(1)–N(22)                       | 2.103           | 2.103           | <b>2.098</b>    | <b>2.098</b>    | 2.103           | <b>2.098</b>    | <b>2.098</b>    | <b>2.098</b>    |
| Ni(1)–O(10)                       | 2.097           | 2.097           | 2.097           | 2.097           | 2.097           | 2.097           | 2.097           | <b>2.077</b>    |
| Ni(1)–O(10) <sup>a</sup>          | 2.094           | 2.094           | 2.094           | 2.094           | 2.094           | 2.094           | 2.094           | <b>2.085</b>    |
| <i>J</i> value / cm <sup>-1</sup> | –26.229         | –25.907         | –25.315         | –25.771         | –26.455         | –25.223         | –26.639         | –26.929         |

**Table S5:** Model complex (**1b**) is created by changing all the Ni–N bond distances in complex **1** to as it is in complex **3**, keeping rest of the parameters unaltered. Model complex (**1c**) is created by changing all the Ni–N bond distances and Ni–O bond distances in complex **1a** to as it is in complex **3a**, keeping rest of the parameters unaltered. Changes are highlighted by bold font.

| Bond length (Å)                   | Model <b>1b</b> | Model <b>1c</b> |
|-----------------------------------|-----------------|-----------------|
| Ni(1)–N(1)                        | <b>2.068</b>    | <b>2.068</b>    |
| Ni(1)–N(2)                        | <b>2.126</b>    | <b>2.126</b>    |
| Ni(1)–N(18)                       | <b>2.101</b>    | <b>2.101</b>    |
| Ni(1)–N(22)                       | <b>2.103</b>    | <b>2.103</b>    |
| Ni(1)–O(10)                       | 2.077           | <b>2.097</b>    |
| Ni(1)–O(10) <sup>a</sup>          | 2.085           | <b>2.094</b>    |
| <i>J</i> value / cm <sup>-1</sup> | -34.967         | -34.944         |

**Table S6.** Model **1d** is obtained through replacement of axially coordinated ACN group by NCS ion in complex **1**, keeping rest of bond parameter fixed. Model **3n** is obtained by means of replacement of axially coordinated NCS group by ACN molecule in complex **3** and kept the other structural parameter constant.  $\Delta J$  represents the change of calculated *J* value between the model structure and their respective parent structure (**1** or **3**).

| Bond length (Å)                   | Model <b>1d</b> | Model <b>3n</b> |
|-----------------------------------|-----------------|-----------------|
| Ni(1)–N(1)                        | 2.171           | 2.068           |
| Ni(1)–N(2)                        | 2.104           | 2.126           |
| Ni(1)–N(18)                       | 2.081           | 2.101           |
| Ni(1)–N(22)                       | 2.098           | 2.103           |
| Ni(1)–O(10)                       | 2.077           | 2.097           |
| Ni(1)–O(10) <sup>a</sup>          | 2.085           | 2.094           |
| <i>J</i> value / cm <sup>-1</sup> | -29.3           | -34.87          |
| $\Delta J$ / cm <sup>-1</sup>     | 8.89            | -8.63           |

## References

1. S. Naiya, H. S. Wang, M. G. Drew, Y. Song and A. Ghosh, *Dalton Trans.*, 2011, **40**, 2744–2756.
2. R. Biswas, S. Giri, S. K. Saha and A. Ghosh, *Eur. J. Inorg. Chem.*, 2012, **17**, 2916–2927.
3. A. Biswas, L. K. Das, M. G. B. Drew, G. Aromí, P. Gamez and A. Ghosh, *Inorg. Chem.*, 2012, **51**, 7993–8001.
4. P. Mukherjee, M. G. B. Drew, C. J. Gómez-García and A. Ghosh, *Inorg. Chem.*, 2009, **48**, 5848–5860.
5. P. Mukherjee, M. G. Drew, C. J. Gómez-García and A. Ghosh, *Inorg. Chem.*, 2009, **48**, 4817–4827.
6. A. Burkhardt, A. Buchholz, H. Görls and W. Z. Plass, *Anorg. Allg. Chem.*, 2013, **14**, 2516–2520.
7. K. K. Nanda, R. Das, L. K. Thompson, K. Venkatsubramanian, P. Paul and K. Nag, *Inorg. Chem.*, 1994, **33**, 1188–1193.
8. P. Mahapatra, S. Ghosh, S. Giri and A. Ghosh, *Polyhedron*, 2016, **117**, 427–436.
